# Supplementary material
Source: PubMed Central journal article supplement (PMC4568301)
Supplement: NIHMS64137-supplement-01.pdf [file NIHMS64137-supplement-01.pdf]

## SUPPLEMENTARY ONLINE DATA

# Recruitment and membrane interactions of host cell proteins during attachment of enteropathogenic and enterohaemorrhagic *Escherichia coli*

Diana MUNERA\*<sup>1</sup>, Eric MARTINEZ\*, Svetlana VARYUKHINA†, Arvind MAHAJAN‡, Jesus AYALA-SANMARTIN† and Gad FRANKEL\*<sup>2</sup>

\*Centre for Molecular Microbiology and Infection, Division of Cell and Molecular Biology, Imperial College London, London SW7 2AZ, U.K., †CNRS UMR7203, Groupe N. J. Conté, Laboratoire des BioMolécules and Université Pierre et Marie Curie, 75005 Paris, France, and ‡Cellular Microbiology Group, Division of Infection and Immunity, Roslin Institute, Royal (Dick) School of Veterinary Studies, University of Edinburgh, Easter Bush, Midlothian EH25 9RG, U.K.

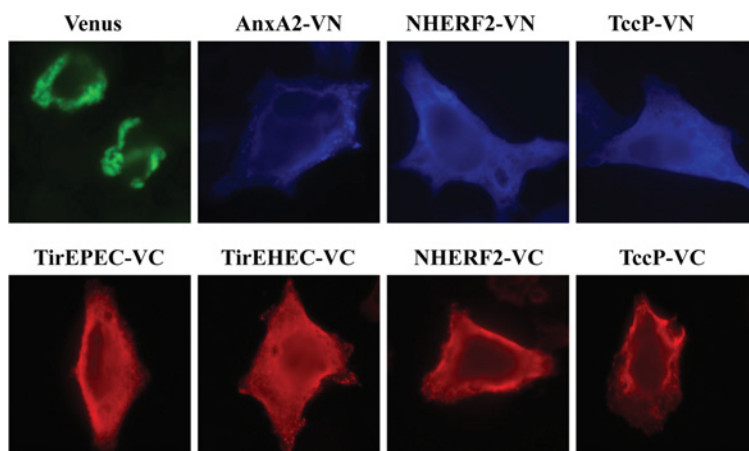

**Figure S1** Expression of BiFC constructs in HeLa cells

Fluorescence microscopy of HeLa cells transfected with Venus protein or BiFC constructs. The green GFP signal in cells transfected with pVenus corresponds to Venus protein. AnxA2–VN was stained with mouse anti–Myc antibodies and NHERF2–VN and TccP–VN were stained with mouse anti–FLAG antibodies, followed by Cy5 (indodicarbocyanine)-conjugated anti–mouse antibodies (blue). Tir–EPEC–VC, Tir–EHEC–VC, NHERF2–VC and TccP–VC were stained with TRITC (tetramethylrhodamine  $\beta$ -isothiocyanate)-conjugated anti–HA (red).

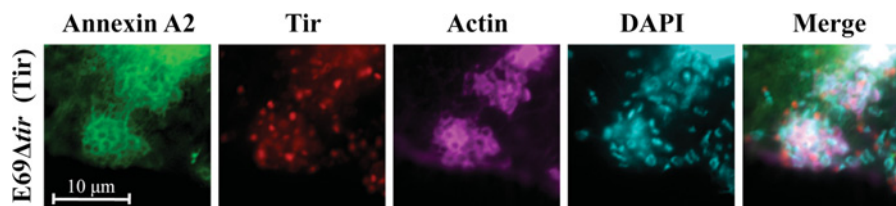

**Figure S2** AnxA2 is recruited during infection of EPEC  $\Delta$ tir complemented with a plasmid encoding Tir

Fluorescence microscopy of HeLa cells transfected with GFP–AnxA2 and infected with EPEC  $\Delta$ tir containing pSA10 encoding Tir. The green GFP signal corresponds to AnxA2, Tir was stained with rabbit anti–Tir followed by Cy3-conjugated anti–rabbit antibodies (red), actin was stained with Alexa Fluor® 647–phalloidin (magenta) and DNA was stained with DAPI (cyan). AnxA2's recruitment is restored during infection of the E69 $\Delta$ tir strain when complemented with plasmid-encoded Tir.

<sup>1</sup> Present address: Channing Laboratory, Brigham and Women's Hospital, Harvard Medical School, and Howard Hughes Medical Institute, Boston, MA 02115, U.S.A.

<sup>2</sup> To whom correspondence should be addressed (email g.frankel@imperial.ac.uk).

**Table S1 Sequences of primers used in the present study**

Restriction sites are in bold.

| Primer                    | Sequence                                                                                                                |
|---------------------------|-------------------------------------------------------------------------------------------------------------------------|
| Fw-BamH1-AnxA2            | 5'-CTG <b>GGATCC</b> ATGTCTACTGTTACGAAATCCTG-3'                                                                         |
| Rv-AnxA2-BamHI            | 5'-CCG <b>GGATCC</b> TAGTCATCTCCACCACACAGGTAC-3'                                                                        |
| SacI-Myc-VN173-For        | 5'-AAGCAG <b>AGCTCG</b> TTTAGTGAACCGTCAGAATTGATCTACCATGGAGCAGAAGCTGATCTCCGAGGAGGACCTGGGAGCAGTGAGCAAGGGCGAGGAGCTGTTCA-3' |
| VN-Anx-BamH1-Rev          | 5'-ACCCG <b>GGATCC</b> TAGTCATCTCCACCACACAGGT-3'                                                                        |
| Fw-EcoRI-Nherf2-VN        | 5'-G <b>CGAATTC</b> GATGGCCGCGCCGGAGCCGCTGCG-3'                                                                         |
| Rv-Nherf2-KpnI-VN         | 5'-ACT <b>GGTACC</b> GAGAAAGTTGCTGAAGATTCACGC-3'                                                                        |
| Fw-EcoRI-Nherf2-VC        | 5'-CC <b>GAATTC</b> GGATGGCCGCGCCGGAGCCGCTGCG-3'                                                                        |
| Rv-Nherf2-KpnI-VC         | 5'-ACG <b>GGTACC</b> GAAGTTGCTGAAGATTCACGC-3'                                                                           |
| Fw-EcoRI-TccP-VN          | 5'-G <b>CGAATTC</b> GATGATTAACAATGTTTCTCA-3'                                                                            |
| Rv-TccP-KpnI-VN           | 5'-ACT <b>GGTACC</b> GACGAGCGCTTAGATGATTAATGC-3'                                                                        |
| Fw-TccP-EcoRI             | 5'-CC <b>GAATTC</b> GGATGATTAACAATGTTTCTCA-3'                                                                           |
| Rv-TccP-VC-KpnI           | 5'-ACG <b>GGTACC</b> GAGCGCTTAGATGATTAAT-3'                                                                             |
| Fw-Tir-EHEC-BglII         | 5'-ACCG <b>AGATCT</b> CTATGCCTATTGGTAATCTTGGT-3'                                                                        |
| Rv-Tir-EHEC-KpnI          | 5'-ACG <b>GGTACC</b> GACGAAACGATGGGATCCCGGC-3'                                                                          |
| Fw-Tir-EPEC-EcoRI         | 5'-CC <b>GAATTC</b> GGATGCCTATTGGTAACCTTGGTA-3'                                                                         |
| Rv-TirVC-EPEC-KpnI        | 5'-ACG <b>GGTACC</b> AACGAAACGTAAGTGGTCCCGGC-3'                                                                         |
| NcoI-Int280 $\gamma$      | 5'-CATG <b>CCATGG</b> ATATTAAGGCTGATAAGACAACTGC-3'                                                                      |
| EcoRI-Int280 $\gamma$ -Rv | 5'-CG <b>GAATTC</b> GGTTCTACACAAACCGCATAGACATTTG-3'                                                                     |
| XbaI-AnxA2                | 5'-GCCCT <b>CTAGA</b> AATAATTTTGTTTAACTTTAAGAAGGAGATATACCATGTCTACTGTTACGAAATCCTGTG-3'                                   |
| AnxA2-XhoI                | 5'-GTGGTG <b>CTCGAG</b> GTTCATCTCCACCACACAGGTACAGC-3'                                                                   |
| AnxA2-C-HA-XhoI           | 5'-GTGGTG <b>CTCGAG</b> AGCGTAATCTGGAACATCGTATGGGTAGTCATCTCCACCACACAGGTACAGC-3'                                         |
| AnxA2-N-HA-XhoI           | 5'-GTGGTG <b>CTCGAG</b> AGCGTAATCTGGAACATCGTATGGGTAGTCATCTCCACCACACAGGTACAGC-3'                                         |
| XbaI-AnxA2-Cterm          | 5'-GCCCT <b>CTAGA</b> AATAATTTTGTTTAACTTTAAGAAGGAGATATACCATGATTGACCAAGAT-3'                                             |
| XbaI-Tir-Fw               | 5'-G <b>CTCTAGA</b> AATAATTTTGTTTAACTTTAAGAAGGAGATATAATGCCATTGGTAATCTTGGTTCAT-3'                                        |
| XhoI-Tir-Rv               | 5'-CCG <b>CTCGAG</b> GACGAAACGATGGGATCCCGGCGC-3'                                                                        |
| Fw-Xba-Tir-EPEC           | 5'-GCCCT <b>CTAGA</b> AATAATTTTGTTTAACTTTAAGAAGGAGATATACCATGCCTATTGGTAACCTTGGTAATAATGTAAT-3'                            |
| TirC-EPEC-NotI-b          | 5'-GTGCTCGAGT <b>GCGGCCG</b> CAACGAAACGTAAGTGGTCCCGGCGTGGT-3'                                                           |
| Fw-Xba-Tir-Citrob         | 5'-GCCCT <b>CTAGA</b> AATAATTTTGTTTAACTTTAAGAAGGAGATATACCATGCCTATTGGTAATCTTGGTAATAATAATAAG-3'                           |
| Rv-Tir-Citrob-NotI        | 5'-GTGCTCGAGT <b>GCGGCCG</b> GACGAAACGTTCAACTCCCGGTGTTGATGC-3'                                                          |
| XbaI-TirN                 | 5'-GCCCT <b>CTAGA</b> AATAATTTTGTTTAACTTTAAGAAGGAGATATACCATGCCTATTGGTAATCTTGGTTCATA-3'                                  |
| TirN-XhoI                 | 5'-GTGGT <b>GCTCGAG</b> AGTCCCAACGCCAACCAAGTTAG-3'                                                                      |
| Rv-TirN-EPEC-NotI         | 5'-GTGCTCGAGT <b>GCGGCCG</b> CTGCGCCGACAGAAACCCAGAATTTAGGA-3'                                                           |
| Rv-TirN-Citrob-NotI       | 5'-GTGCTCGAGT <b>GCGGCCG</b> CTGCGCCGACAGAAACCCAGAATTTAGGA-3'                                                           |
| XbaI-TirC                 | 5'-GCCCT <b>CTAGA</b> AATAATTTTGTTTAACTTTAAGAAGGAGATATACCATGAGTGGCGCATGATTCTTGGTGGGGGA-3'                               |
| TirC-XhoI                 | 5'-GTGGT <b>GCTCGAG</b> GACGAAACGATGGGATCCCGGCGCTG-3'                                                                   |
| XbaI-TirC-EPEC            | 5'-GCCCT <b>CTAGA</b> AATAATTTTGTTTAACTTTAAGAAGGAGATATACCATGAGCAGTGCATTGATTGTTGCTGGGGGA-3'                              |
| XbaI-TirC-Citrob          | 5'-GCCCT <b>CTAGA</b> AATAATTTTGTTTAACTTTAAGAAGGAGATATACCATGAGTAGTGCATTGATTGTTGTTGGTGGGA-3'                             |
| TirC-Citrob-NotI-b        | 5'-GTGCTCGAGT <b>GCGGCCG</b> GACGAAACGTTCAACTCCCGGTGTTGTA-3'                                                            |

Received 29 March 2012/14 May 2012; accepted 16 May 2012

Published as BJ Immediate Publication 16 May 2012, doi:10.1042/BJ20120533
